# Supplementary material
Source: publisher site journal article supplement (https://www.dovepress.com/article/378547)
Supplement: Supplementary file 1 [file get_supplementary_file.php]

**Supplement Tables**

**Tab. S1:** **miRNA primers used for qRT-PCR**

| miRNA | Primer sequence (5′–3′) | Tm (◦C) |
| --- | --- | --- |
| hsa-miR-708-5p | AGCTTACAATCTAGCTGGGAA | 60 |
| novel771_mature | GACCTCCTGGGATCGCATCTGG | 60 |
| hsa-miR-370-3p | CTGGGGTGGAACCTGGTAA | 60 |
| hsa-miR-1275 | GTGGGGGAGAGGCTGTC | 60 |
| hsa-miR-134-5p | TGTGACTGGTTGACCAGAGGGG | 60 |
| 5S rRNA | GGAGACCGCCTGGGAATA | 60 |

**Tab. S2:** **Summary of the small RNA sequencing data.**

| Sample | RawReads | reads_trimmed_length | reads_trimmed_Q20 | CleanReads | CleanReads_uniq |
| --- | --- | --- | --- | --- | --- |
| Case1 | 26317201 | 22854962 | 22744330 | 22742046 | 916387 |
| Case2 | 24303427 | 21106829 | 20971484 | 20965855 | 899099 |
| Case3 | 27232340 | 24249188 | 24167245 | 24167237 | 859490 |
| Control1 | 34175661 | 30807534 | 30657753 | 30657749 | 910604 |
| Control2 | 22946397 | 20502439 | 20422857 | 20422852 | 967065 |
| Control3 | 25271873 | 22781284 | 22712860 | 22712854 | 890647 |

**Tab. S3: Identification of conserved and novel miRNAs**

| Sample | Number of conserved miRNA | Number of novel miRNA |
| --- | --- | --- |
| Case1 | 1059 | 584 |
| Case2 | 1008 | 503 |
| Case3 | 1087 | 584 |
| Control1 | 1125 | 636 |
| Control2 | 1050 | 587 |
| Control3 | 1128 | 664 |
